# Supplementary material
Source: PubMed Central journal article supplement (PMC8695304)
Supplement: RA-011-D1RA00870F-s001.pdf [file RA-011-D1RA00870F-s001.pdf]

## Supplementary Information

### Conformational fingerprinting of tau variants and strains by Raman spectroscopy

George Devitt<sup>1,2,3\*</sup>, Anna Crisford<sup>1,2</sup>, William Rice<sup>2</sup>, Hilary A. Weismiller<sup>4</sup>, Zhanyun Fan<sup>5</sup>, Caitlin Commins<sup>5</sup>, Bradley T. Hyman<sup>5</sup>, Martin Margittai<sup>4</sup>, Sumeet Mahajan<sup>2,3\*</sup>, Amrit Mudher<sup>1,3\*</sup>

<sup>1</sup>School of Biological Sciences, Faculty of Environmental and Life Sciences, University of Southampton, Highfield, Southampton SO17 1BJ, UK.

<sup>2</sup>School of Chemistry, Faculty of Engineering and Physical Sciences, University of Southampton, Highfield, Southampton SO17 1BJ, UK.

<sup>3</sup>Institute for Life Sciences, University of Southampton, Highfield, Southampton SO17 1BJ, UK.

<sup>4</sup>Department of Chemistry and Biochemistry, University of Denver, 2190 E. Iliff Ave., Denver, CO 80208, USA.

<sup>5</sup>Department of Neurology, Harvard Medical School, MassGeneral Institute for Neurodegenerative Disease, Massachusetts General Hospital, Charlestown, MA, 02129, United States

E-mail: G.T.Devitt@soton.ac.uk, S.Mahajan@soton.ac.uk, A.Mudher@soton.ac.uk

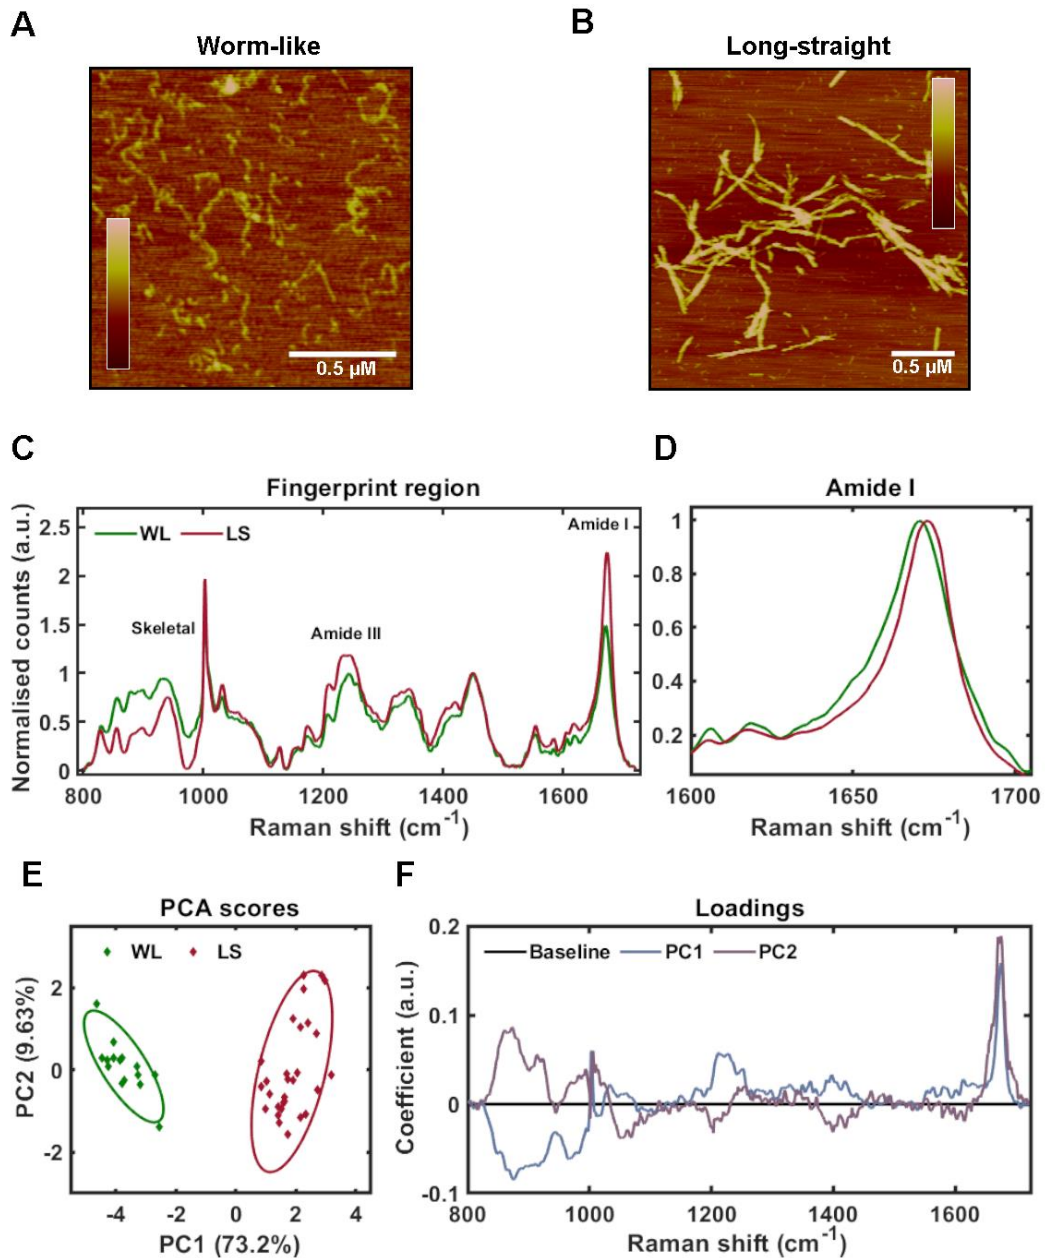

**Supplementary Figure 1. Raman fingerprints of  $\beta$ 2M fibril strains**

**A-B)** AFM images of  $\beta$ 2M fibrils aggregated in high salt buffer (**A**, worm-like) or low salt buffer (**B**, long-straight). Scale bar = 0.5  $\mu$ m (**A**), 1  $\mu$ m (**B**), Z scale = 0 nm-15 nm (**A**), 0 nm-25 nm (**B**). **C)** Raman spectra of sedimented  $\beta$ 2M fibrils aggregated in high salt buffer (green trace, WL), or low salt buffer (red trace, LS). Amide I, amide III and skeletal regions are highlighted. **D)** Normalised amide I region for the Raman spectra shown in **C**. **E)** 2-dimensional principal component analysis (PCA) scores plot of Raman spectra shown in **C**. Each solid diamond represents the PC score of a single spectrum. **F)** PC loadings spectra representing the spectral variation responsible for the score across the PC1 axis shown in **C**. Raman spectra represent the class means from multiple spectra; worm-like  $\beta$ 2M fibrils: 15, long-straight  $\beta$ 2M fibrils: 30.

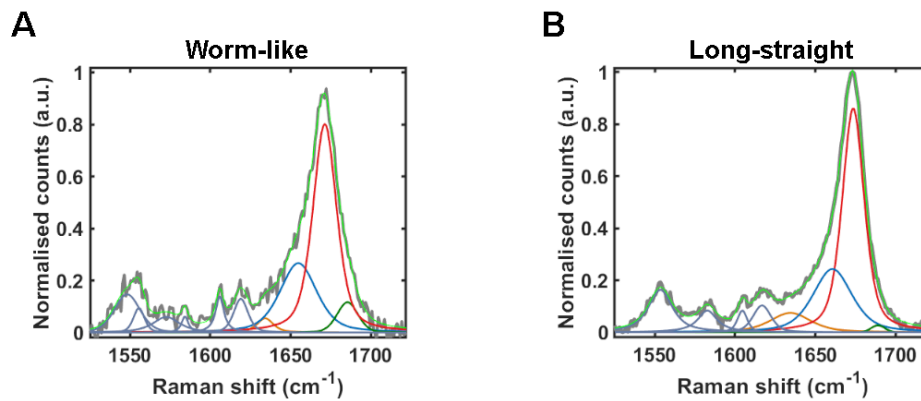

**C**

| Strain        | Nonregular/coupling           |                           |          | Turn/ $\alpha$ -helix         |                           |          | $\beta$ -sheet                |                           |          | Nonregular                    |                           |          |
|---------------|-------------------------------|---------------------------|----------|-------------------------------|---------------------------|----------|-------------------------------|---------------------------|----------|-------------------------------|---------------------------|----------|
|               | Frequency (cm <sup>-1</sup> ) | Width (cm <sup>-1</sup> ) | Area (%) | Frequency (cm <sup>-1</sup> ) | Width (cm <sup>-1</sup> ) | Area (%) | Frequency (cm <sup>-1</sup> ) | Width (cm <sup>-1</sup> ) | Area (%) | Frequency (cm <sup>-1</sup> ) | Width (cm <sup>-1</sup> ) | Area (%) |
| Worm-like     | 1634                          | 12                        | 3        | 1655                          | 27                        | 30       | 1671                          | 18                        | 60       | 1685                          | 15                        | 7        |
| Long-straight | 1634                          | 30                        | 10       | 1661                          | 29                        | 30       | 1674                          | 16                        | 60       | 1689                          | 10                        | 0        |

**Supplementary Figure 2. Secondary structure composition from amide I curve-fitting analysis of  $\beta$ 2M fibril strains**

Curve-fitting analysis of amide I band (1525-1725 cm<sup>-1</sup>) from  $\beta$ 2M fibril spectra including; worm-like fibrils (**A**) and long-straight fibrils (**B**). Non-fitted amide I band is shown in grey, with the fitted curve shown in light green. Underlying peaks corresponding to secondary structure are shown in dark green (nonregular), red ( $\beta$ -sheet), blue (turn/helix), and orange (coupling/nonregular). Aromatic amino acid peaks are shown in purple. **C**) Table showing secondary structural composition determined from curve-fitting analysis.

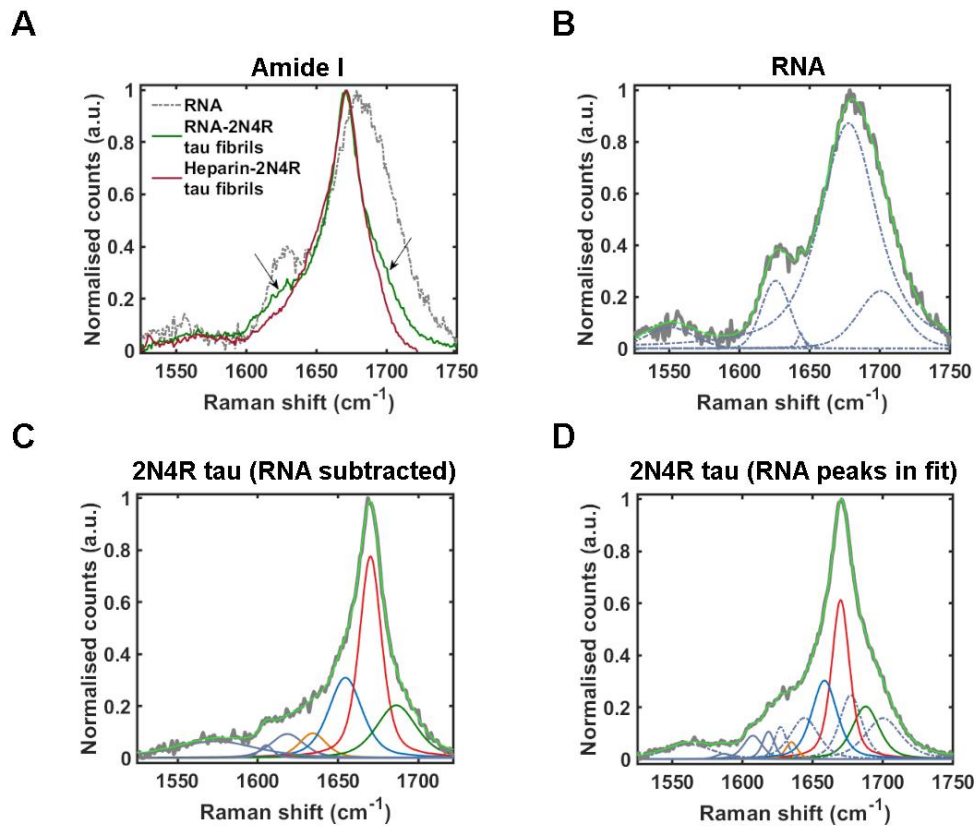

**E**

| Curve-fitting method      | Nonregular/coupling           |                           |          | Turn/ $\alpha$ -helix         |                           |          | $\beta$ -sheet                |                           |          | Nonregular                    |                           |          |
|---------------------------|-------------------------------|---------------------------|----------|-------------------------------|---------------------------|----------|-------------------------------|---------------------------|----------|-------------------------------|---------------------------|----------|
|                           | Frequency (cm <sup>-1</sup> ) | Width (cm <sup>-1</sup> ) | Area (%) | Frequency (cm <sup>-1</sup> ) | Width (cm <sup>-1</sup> ) | Area (%) | Frequency (cm <sup>-1</sup> ) | Width (cm <sup>-1</sup> ) | Area (%) | Frequency (cm <sup>-1</sup> ) | Width (cm <sup>-1</sup> ) | Area (%) |
| RNA spectrum subtracted   | 1634                          | 20                        | 7        | 1655                          | 25                        | 27       | 1670                          | 16                        | 45       | 1686                          | 30                        | 21       |
| RNA peaks included in fit | 1635                          | 10                        | 3        | 1658                          | 21                        | 31       | 1670                          | 15                        | 44       | 1688                          | 23                        | 22       |
| Average                   | 1635                          | 15                        | 5        | 1657                          | 23                        | 29       | 1670                          | 16                        | 45       | 1687                          | 27                        | 21       |

**Supplementary Figure 3. Secondary structure composition from amide I curve-fitting analysis of RNA**

**A)** Carbonyl bond stretching/amide I region for neat RNA (grey thatched line), 2N4R tau fibrils generated in PBS using RNA as a cofactor (green line) and 2N4R tau fibrils generated in PBS using heparin as a cofactor (red line). Arrows indicate regions in the amide I spectrum of tau fibrils generated using RNA that align with peaks in the neat RNA spectrum. **B)** Curve-fitting analysis of carbonyl band (1525-1750 cm<sup>-1</sup>) of the neat RNA spectrum shown in **A** (grey line). **C)** Curve-fitting analysis of amide I band (1525-1725 cm<sup>-1</sup>) of tau fibril spectra generating using RNA shown in **A** (green line) after 27% subtraction of RNA spectrum shown in **A** (grey line). **D)** Curve-fitting analysis of amide I band (1525-1725 cm<sup>-1</sup>) of tau fibril spectra generating using RNA shown in **A** (green line) with additional RNA peaks included. The frequency of these peaks were determined from the curve-fit of neat RNA shown in **B**. For curve-fits, the non-fitted amide I band is shown in grey, with the fitted curve shown in light green. Underlying peaks corresponding to secondary structure are shown in dark green (nonregular), red ( $\beta$ -sheet), blue (turn/helix), and orange (coupling/nonregular). Aromatic amino acid peaks are shown in purple. And RNA peaks are shown in thatched-purple. **C)** Table showing secondary structural composition determined from curve-fitting analysis.

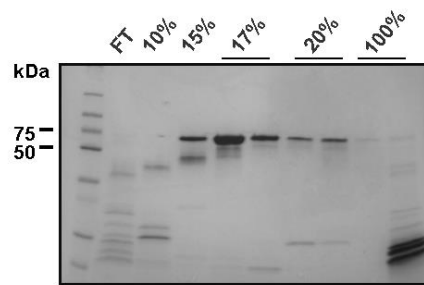

**Supplementary Figure 4. SDS-PAGE purity of recombinant tau protein**

Eluted fractions from cation exchange chromatography were mixed with Laemmli sample buffer and separated by SDS-PAGE. Protein was visualised using Coomassie Brilliant Blue dye. Full-length 2N4R Tau is found in 15%, 17% and 20% fractions. 17% fractions were typically judged to be the purest and used for subsequent experiments.
